# Supplementary material for: Rapid and Sensitive On-Site Detection of Fipronil in Foods Using Evanescent Wave Fluorescent Immunosensor
Source: MDPI journal article supplement (doi:10.3390/chemosensors11120578), 2023-12-17
Supplement: s1 [file s1]

## Supporting information

### The method of labeling anti-FIP antibodies with Cy5.5

The anti-FIP antibody was labeled with Cy5.5 according to the manufacturer's instructions. One milliliter of anti-fipronil antibody (0.5 mg/mL) was subjected to dialysis against a NaCl solution (0.15 M) at room temperature. After a duration of 4 hours, the dialysate was substituted with a fresh solution and dialyzed at a temperature of 4 degrees Celsius throughout the night. The solution was replaced with NaHCO<sub>3</sub> (0.1 M), and dialysis continued for 4 hours at RT. The ratio of Cy5.5-NHS to antibody required was calculated to be 20:1. Cy5.5 was dissolved in DMSO to a concentration of 10 mg/mL and slowly added to the antibody solution. The mixture was incubated in a shaker at a low speed at RT for 30 min away from light. The labeled antibodies were harvested following dialysis with 0.15 M NaCl at room temperature and subsequently at 4°C.

Figure S1. Synthesis of coating-antigen FIP-OVA.

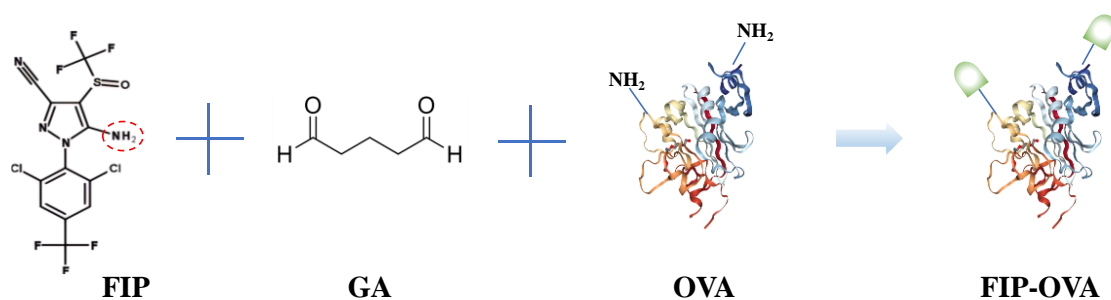

Figure S2. Functionalization of fiber bioprobe using FIP-OVA.

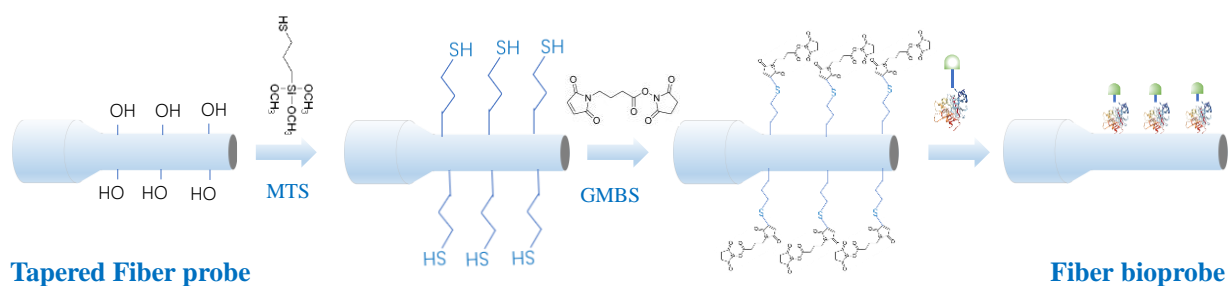

Figure S3. Characteristics of immunogen and coating-antigen. The SDS-PAGE image for the gel electrophoresis testing of FIP-BSA, BSA, FIP-OVA, and OVA. marker: 170, 130, 100, 70, 55, 40, 35, 25, 15, and 10 kDa (Up to down).

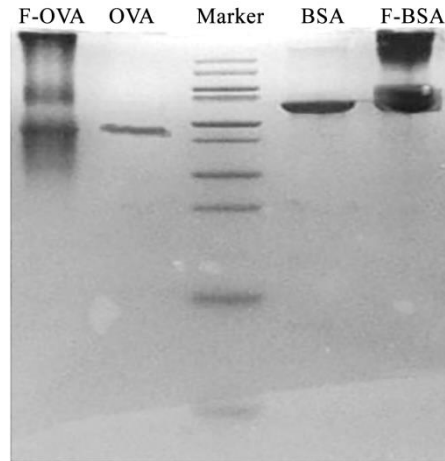

Figure S4. Sensitivity of antibodies. (A) Clone F-3F6. (B) Clone F-4G9

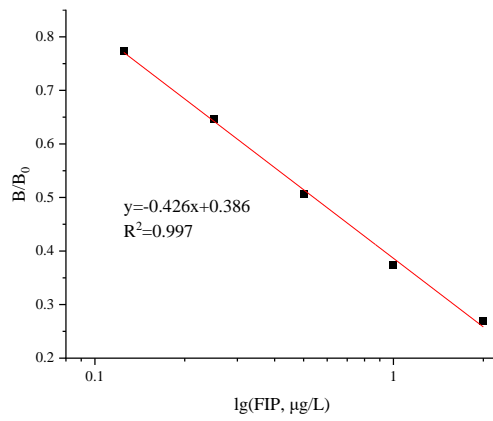

(A)

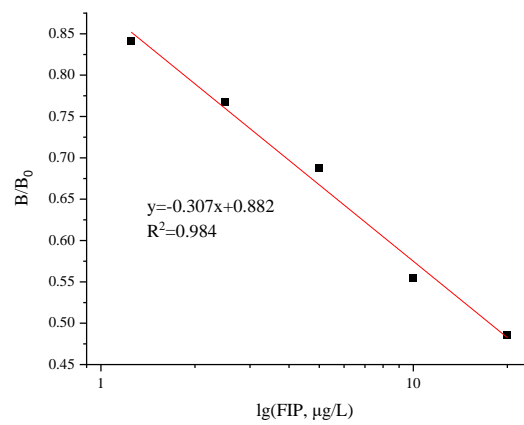

(B)

Figure S5 Dose-response curve of FIP using ELISA.

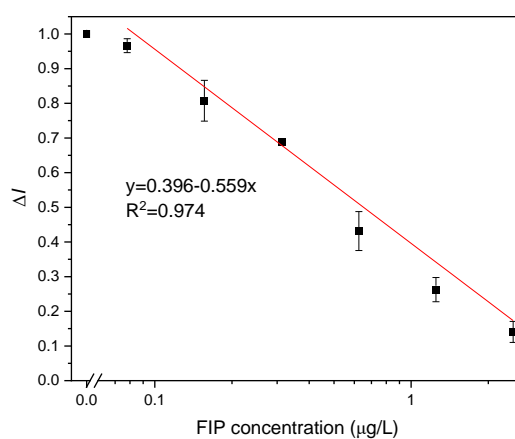

Figure S6 The regeneration performance of the functionalized fiber bioprobe with FIP 0.75  $\mu\text{g/mL}$  antibody.

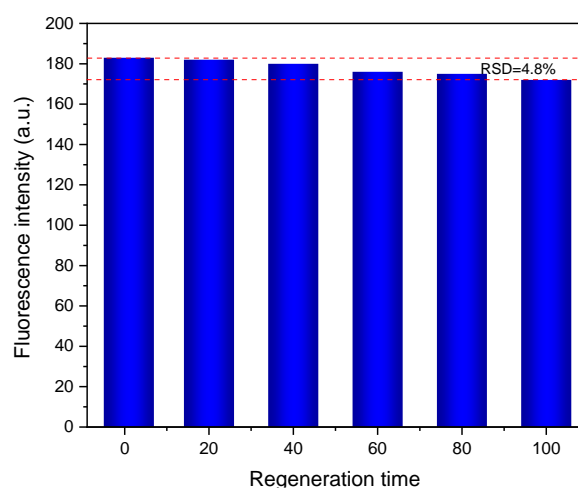

Table S1 Measurement of the concentration and valence of monoclonal antibody

| Monoclonal antibody | Concentration (mg/mL) | Valence                |
|---------------------|-----------------------|------------------------|
| F-3F6               | 8.5                   | 1:2.0×10 <sup>6</sup>  |
| F-4G9               | 6.7                   | 1:5.12×10 <sup>5</sup> |

Table S2 Comparison between other reports and this work on analytical performance of available sensors for simultaneous detection of multiple pesticides

| Methods                                                | Quantitation or not | LOD        | Detection time | Reusability | Ref       |
|--------------------------------------------------------|---------------------|------------|----------------|-------------|-----------|
| <b>Lateral Flow immunoassay</b>                        | No                  | 25.0 µg/L  | /              | No          | [1]       |
| <b>Fluorescent immunoassay</b>                         | 1.39 – 53.12 µg/L   | 210.0 µg/L | 45 min         | No          | [2]       |
| <b>ELISA</b>                                           | 0.54 – 12.6 µg/L    | 0.22 µg/L  | 150 min        | No          | [3]       |
| <b>Camel single-domain antibody-based Immunoassays</b> | 30.0 – 1000.0 µg/L  | 10.0 µg/L  | 150 min        | No          | [4]       |
| <b>Lateral Flow immunoassay</b>                        | No                  | 160.0 µg/L | /              | No          | [5]       |
| <b>icELISA</b>                                         | 2.5 – 210.0 µg/L    | 0.23 µg/L  | 150 min        | No          | [6]       |
| <b>Evanescence wave fluorescence biosensor</b>         | 0.25 – 425.0 µg/L   | 0.032 µg/L | 15 min         | Yes         | This work |

## References:

1. Yao, J.; Wang, Z.; Guo, L.; Xu, X.; Liu, L.; Kuang, H.; Xu, C. Lateral flow immunoassay for the simultaneous detection of fipronil and its metabolites in food samples. *Food Chem.* **2021**, *356*, 129710.
2. Sun, X.; Zhang, J.; Lu, Q.; Tian, J.; Kong, D.; Luo, J.; Yang, M. Development of a sensitive fluorescent immunoassay based on fluorescent nanoparticles labeling for the quantitation of fipronil in edible flowers. *LWT* **2023**, *184*, 115113.

3. Vasylieva, N.; Ahn, K.C.; Barnych, B.; Gee, S.J.; Hammock, B.D. Development of an Immunoassay for the Detection of the Phenylpyrazole Insecticide Fipronil. *Environ. Sci. Technol.* **2015**, *49*, 10038–10047.
4. Wang, K.; Vasylieva, N.; Wan, D.; Eads, D.A.; Yang, J.; Tretten, T.; Barnych, B.; Li, J.; Li, Q.X.; Gee, S.J.; et al. Quantitative detection of fipronil and fipronil-sulfone in sera of black-tailed prairie dogs and rats after oral exposure to fipronil by camel single-domain antibody-based immunoassays. *Anal. Chem.* **2019**, *91*, 1532–1540.
5. Zhou, X.H.; Zhang, C.Q.; Zhang, X.; Sun, C.; Li, J.; Xiao, X.; Ouyang, Q.; Wang, Y. Determination of fipronil and its metabolites in eggs by indirect competitive ELISA and lateral-flow immunochromatographic strip. *Biomed. Environ. Sci.* **2020**, *33*, 731–734.
6. Li, P.; Bai, Y.; Jiang, H.; Zhang, Y.; Li, Y.; Duan, C.; Wen, K.; Yu, X.; Wang, Z. Broad-specificity antibody profiled by hapten prediction and its application in immunoassay for fipronil and major metabolites. *J. Hazard. Mater.* **2023**, *441*, 129931.
